# Supplementary material for: Synthesis and characterization of a plasma carbon aerosol coated sponge for recyclable and efficient separation and adsorption
Source: Royal Society of Chemistry journal article supplement (doi:10.1039/c6ra26275a), 2017-01-01
Supplement: c6ra26275a1.pdf [file c6ra26275a1.pdf]

## Supporting Information

### Synthesis and characterization of plasma carbon aerosol coated sponge for recyclable and efficient separation and adsorption

Angjian Wu, Jianhua Yan\*, Xiaodong Li, Jian Yang,

State Key Laboratory of Clean Energy Utilization, Institute for Thermal Power Engineering, Zhejiang University, 38# Zheda Road, Hangzhou, Zhejiang 310027, P. R. China

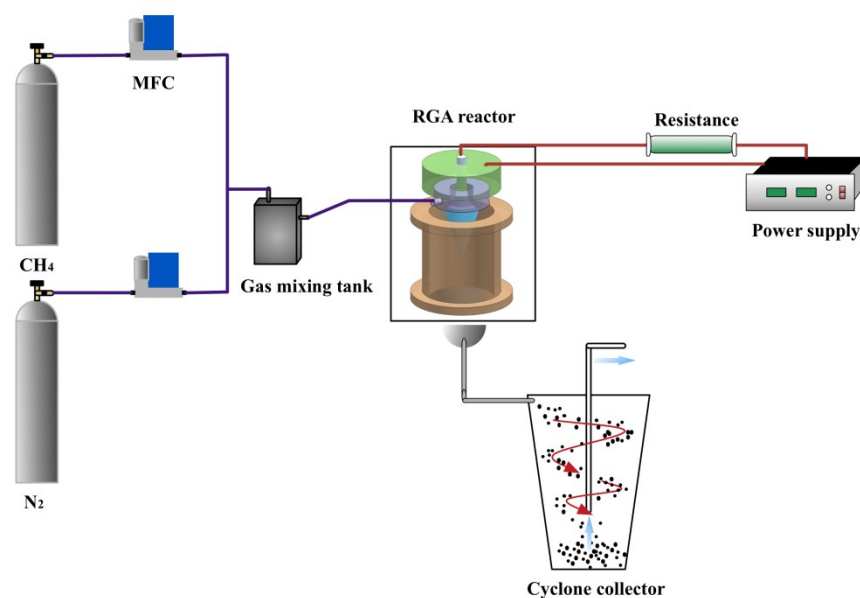

**Figure S1.** Scheme of rotating gliding arc system for carbon aerosol synthesis

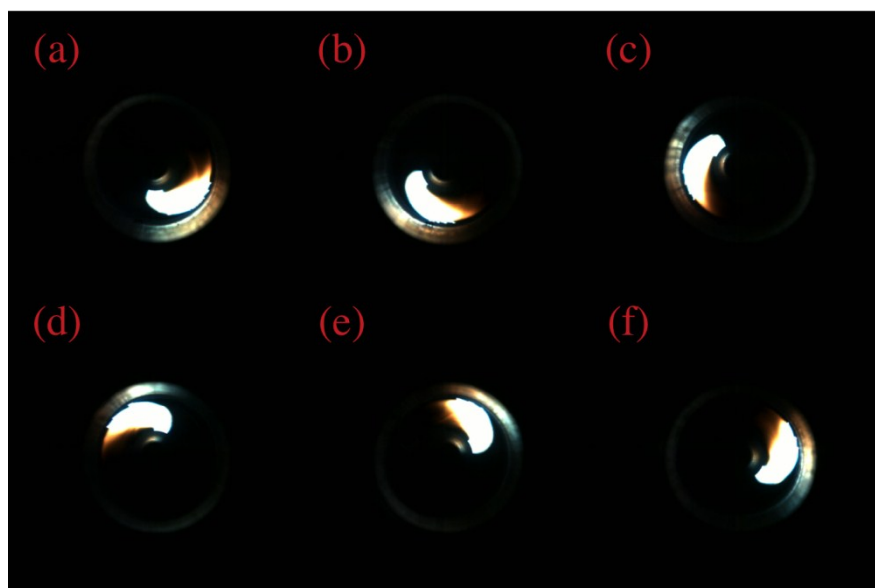

**Figure S2.** Dynamic behavior of arc motions in  $\text{CH}_4/\text{N}_2$  discharge (frame rate= 500 frames/s)

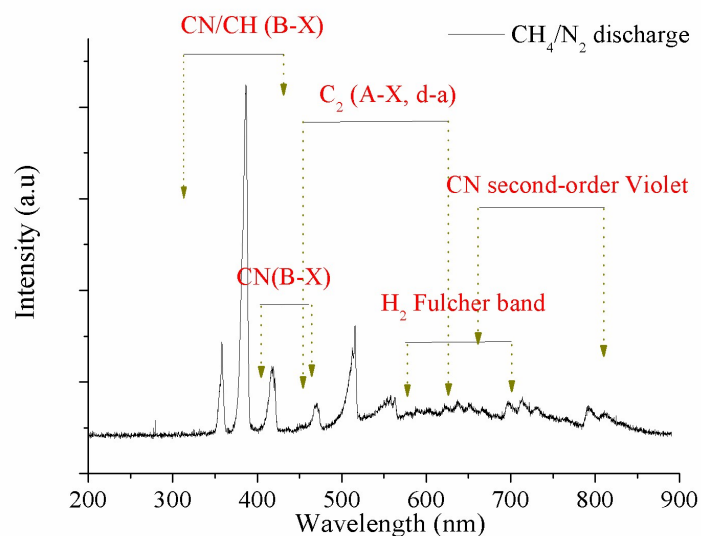

**Figure S3.** OES spectrum of  $\text{CH}_4/\text{N}_2$  discharge ( $\text{CH}_4/\text{N}_2=0.2$ , applied voltage=10 kV, gas flow rate=6  $\text{L min}^{-1}$ )

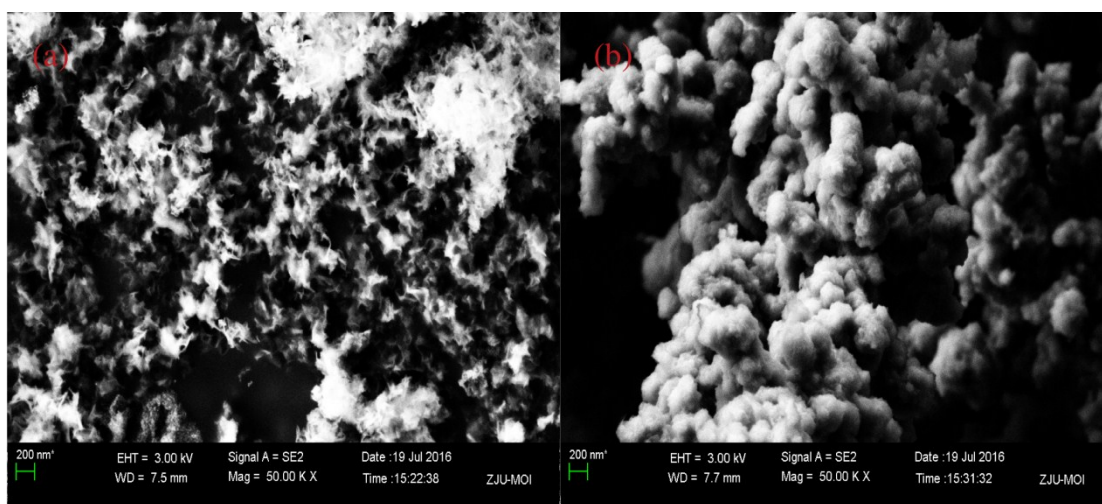

**Figure S4.** a) SEM images of nanostructure carbon aerosol ( $\text{CH}_4/\text{N}_2=0.2$ ). b) SEM images of nanostructure carbon aerosol ( $\text{CH}_4/\text{N}_2=0.8$ )

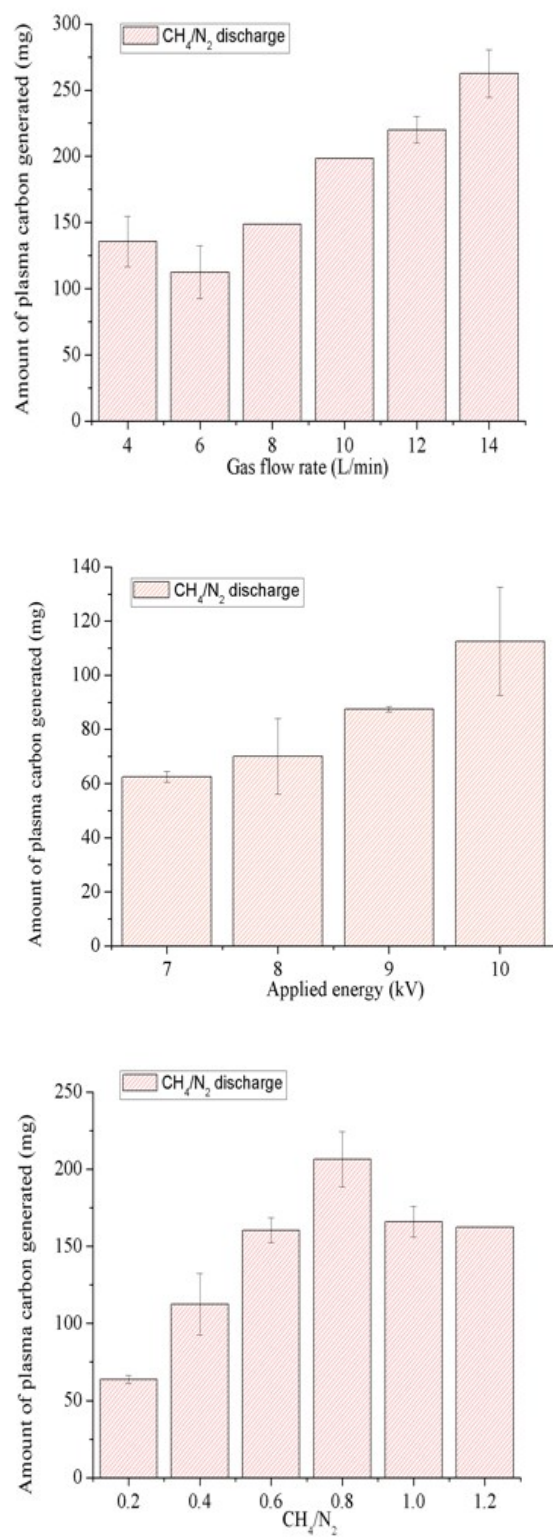

**Figure S5.** The influences of operating parameters (gas flow rate, applied voltage and CH<sub>4</sub>/N<sub>2</sub> ratio) on the growth rate of carbon aerosol

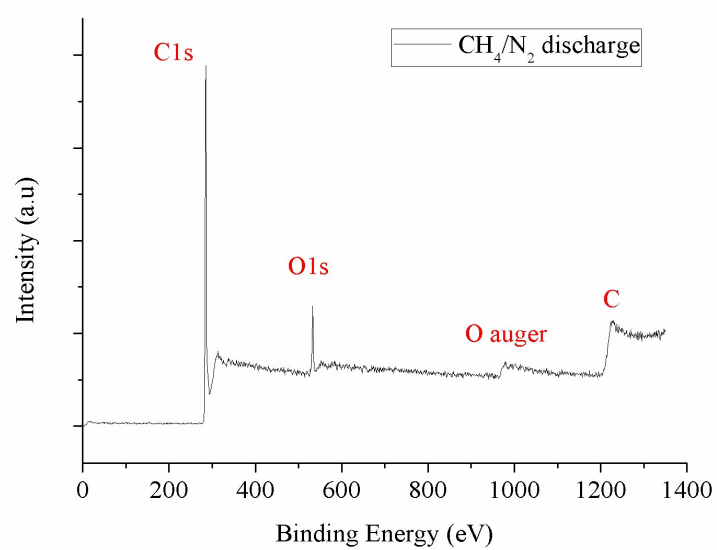

**Figure S6.** Full scanning XPS spectra of plasma-generated carbon aerosol

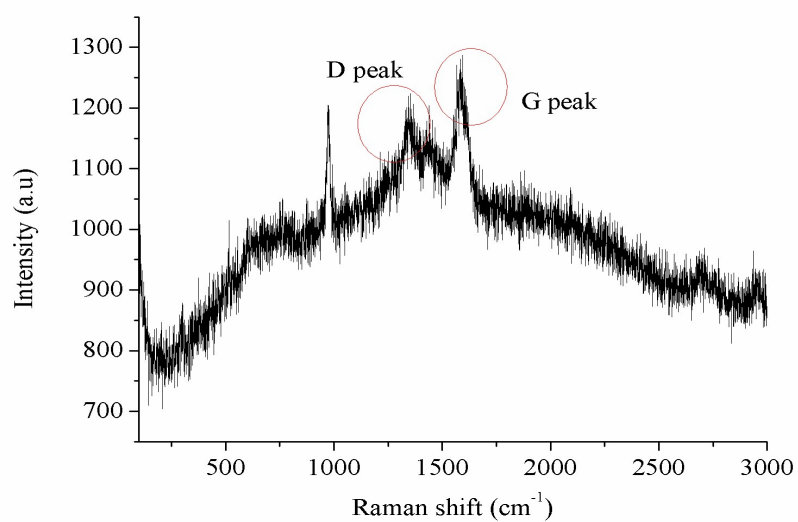

**Figure S7.** Raman spectrum of carbon aerosol coated sponge

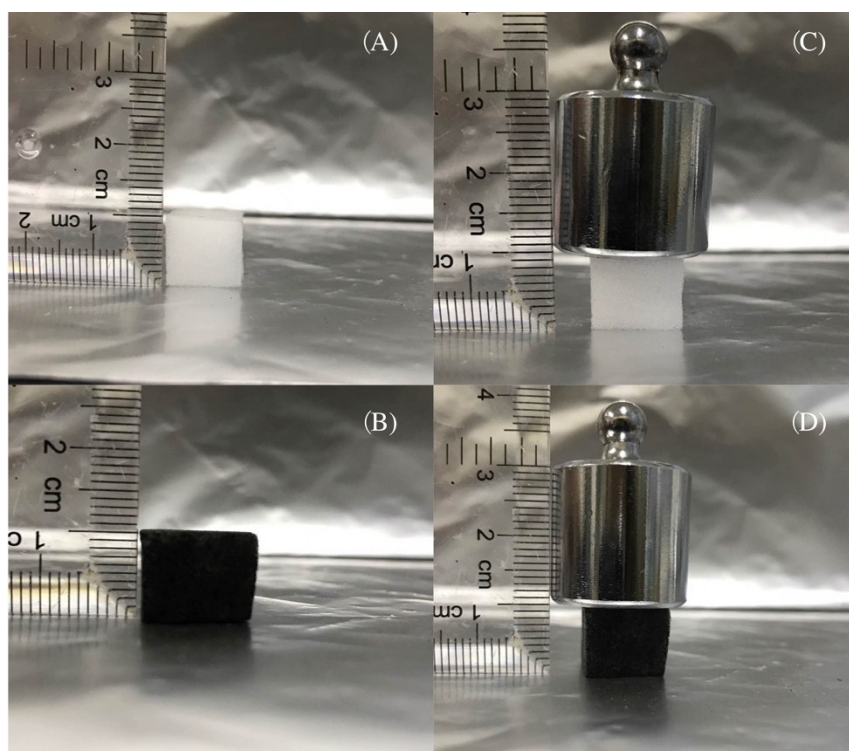

**Figure S8.** Digital photograph of same weight on the pristine sponge and carbon aerosol coated sponge.

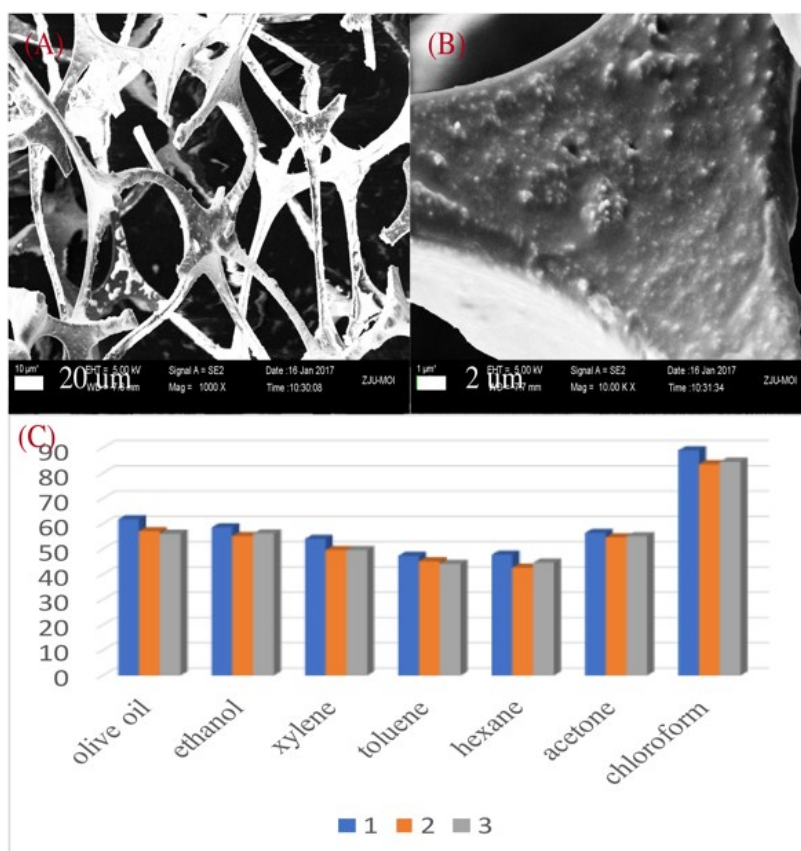

**Figure S9.** A) SEM image of commercial melamine sponge with carbon aerosol and PDMS (scale bar: 20  $\mu\text{m}$ ); The enlarge SEM image of carbon aerosol

**embedded in PDMS matrix (scale bar: 2  $\mu\text{m}$ ); Adsorption tests of sponge decorated with both carbon aerosol and PDMS.**

**Table S1.** Comparison of various adsorption materials

| Adsorption materials         | Adsorbates           | Absorption capacity ( $\text{g g}^{-1}$ ) | recyclability                              | Ref.         |
|------------------------------|----------------------|-------------------------------------------|--------------------------------------------|--------------|
| Carbon soot sponge           | oil                  | $\sim 80$                                 | $\sim 94\%$ capacity remaining (10 cycles) | 1            |
| Carbon aerogel               | Oil/organic solvents | 16-50                                     | $>95\%$ capacity remaining (6 cycles)      | 2            |
| Graphene sponge              | oil                  | 165                                       | 20% capacity remaining (5 cycles)          | 11           |
| Spongy graphene              | oil                  | 20-86                                     | $>99\%$ capacity remaining (6 cycles)      | 12           |
| CNT/Carbon foam              | oil                  | 28                                        | /                                          | 26           |
| CNT sponge                   | oil                  | 100                                       | 20-40% capacity remaining (10 cycles)      | 27           |
| Expanded graphite            | oil                  | 83                                        | /                                          | 28           |
| Graphene aerogel             | Oil/organic solvents | 30-40                                     | /                                          | 29           |
| Carbon fiber aerogel         | organic solvents     | 50-192                                    | /                                          | 30           |
| Reduced graphite Oxide foam  | Organic solvents     | 26-37                                     | $>99\%$ capacity remaining (10 cycles)     | 31           |
| Plasma carbon aerosol sponge | Oil/organic solvents | 61 (for oil)<br>86 (for chloroform)       | $>90\%$ capacity remaining (5 cycles)      | Present work |

#### Reference:

- [26] N. Xiao, Y. Zhou, Z. Ling, J. H. Qiu, *Carbon* **2013**, 59, 530.
- [27] X. Gui, H. Li, K. Wang, J. Wei, Y. Jia, Z. Li, L. Fan, A. Cao, H. Zhu, D. Wu, *Acta Materialia*. **2011**, 59, 4798.
- [28] M. F. Zhao, P. Liu, *Desalination*. **2009**, 249, 331.
- [29] H. P. Cong, X. C. Ren, P. Wang, S. H. Yu, *ACS Nano* **2012**, 2693.
- [30] H. Bi, Z. Yin, X. Cao, X. Xie, C. Tan, X. Huang, B. Chen, F. Chen, Q. Yang, X. Bu, X. Lu, L. Sun, H. Zhang, *Adv. Mater.* **2013**, 25, 5916.
- [31] Z. Niu, J. Chen, H. H. Hng, J. Ma, X. D. Chen, *Adv. Mater.* **2012**, 24, 4144.
